# Supplementary material for: Non-Overlapping Distributions and Functions of the VDAC Family in Ciliogenesis
Source: Cells. 2015 Jul 31;4(3):331–53. doi: 10.3390/cells4030331 (PMC4588040; doi:10.3390/cells4030331)
Supplement: Supplementary file 1 [file cells-04-00331-s001.pdf]

## Supplementary

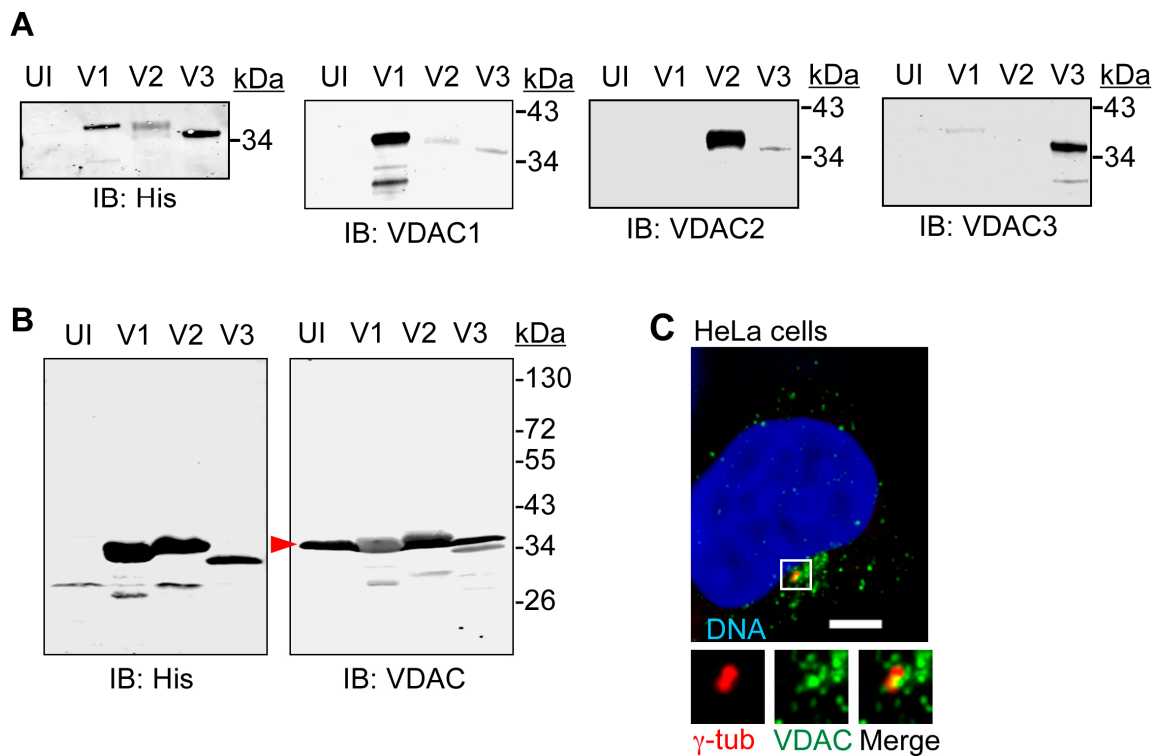

**Figure S1.** Antibodies against each VDAC show minimal cross-reactivity to the other two VDACCs on immunoblots. **(A–B)** Crude lysates of uninduced (UI) and induced bacterial cells expressing 6XHis-VDACC1 (V1), 6XHis-VDACC2 (V2), and 6XHis-VDACC3 (V3) were immunoblotted with indicated antibodies. Molecular weight standards (kDa) are shown next to the immunoblots. **(A)** The anti-VDACC antibody (Cell Signaling) was raised against recombinant VDACC1 proteins, and is referred to as anti-VDACC1 antibody. Nearly equal amount of His-tagged proteins were loaded as analyzed by coomassie staining. All three antibodies detected their specific VDAC protein very strongly, and showed minimal cross-reactivity other two VDACCs; **(B)** Samples were immunoblotted with anti-His antibody (also shown in [28]) and another anti-VDACC antibody (from Calbiochem) that reacted almost equally to each three His-VDACC protein. The red arrowhead indicates a non-specific protein detected by this anti-VDACC antibody; **(C)** Representative image of a S-phase arrested HeLa cell stained by antibodies against  $\gamma$ -tubulin ( $\gamma$ -tub; red), and VDACC (Calbiochem; green). DNA is blue and bar = 5  $\mu$ m. Roughly 30%–40% of HeLa cells show VDACC staining at centrosomes in addition to cytoplasmic foci.

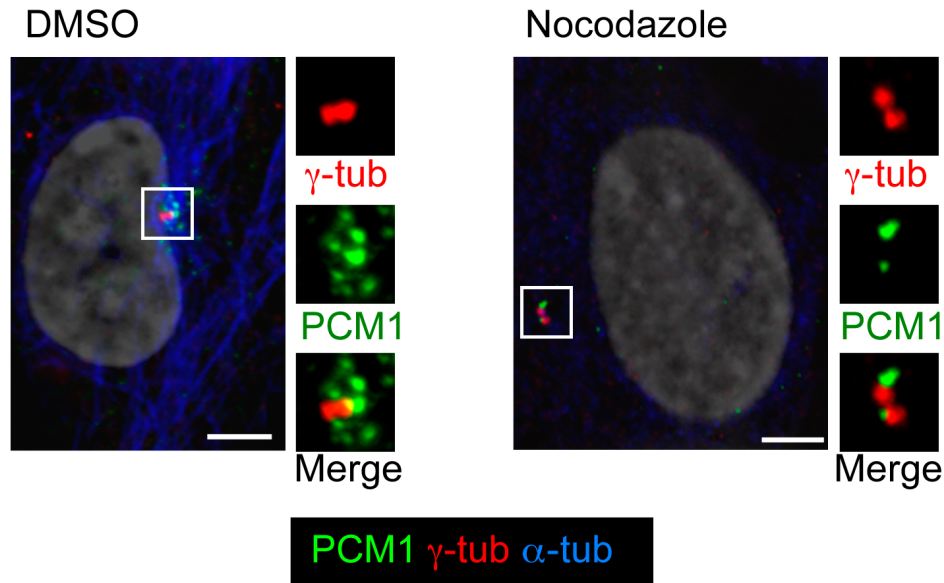

**Figure S2.** Nocodazole treatment disrupts the organization of centriolar satellites. Representative images of RPE1 cells prepared as in Figure 4 and stained for PCM1 (green, marker for centriolar satellites),  $\gamma$ -tub (red), and  $\alpha$ -tubulin ( $\alpha$ -tub, blue). Clearly, nocodazole treatment disrupted the microtubule network, and thereby led to disorganization of centriolar satellites as judged by PCM1 staining.

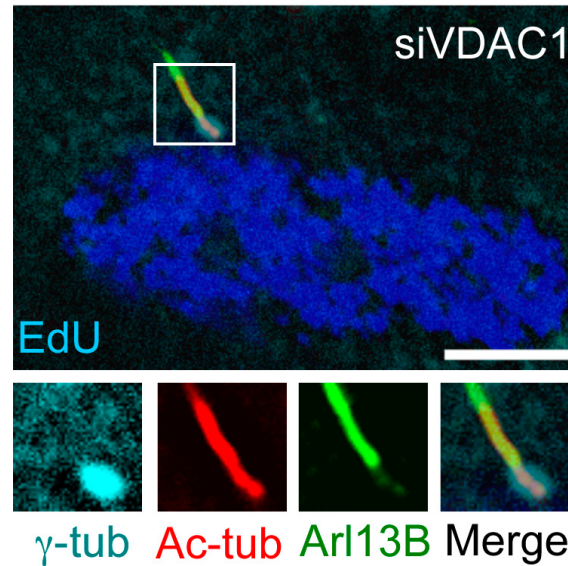

**Figure S3.** Inappropriately formed cilia in growing siVDAC1 cells contain ciliary membrane. Representative image of a siVDAC1 cell prepared as in Figure 5A, labeled with EdU (blue) for 4 h, and stained for  $\gamma$ -tub (cyan), Ac-tub (red) and Arl13B (marker for ciliary membrane; green). Bar is 5  $\mu$ m.

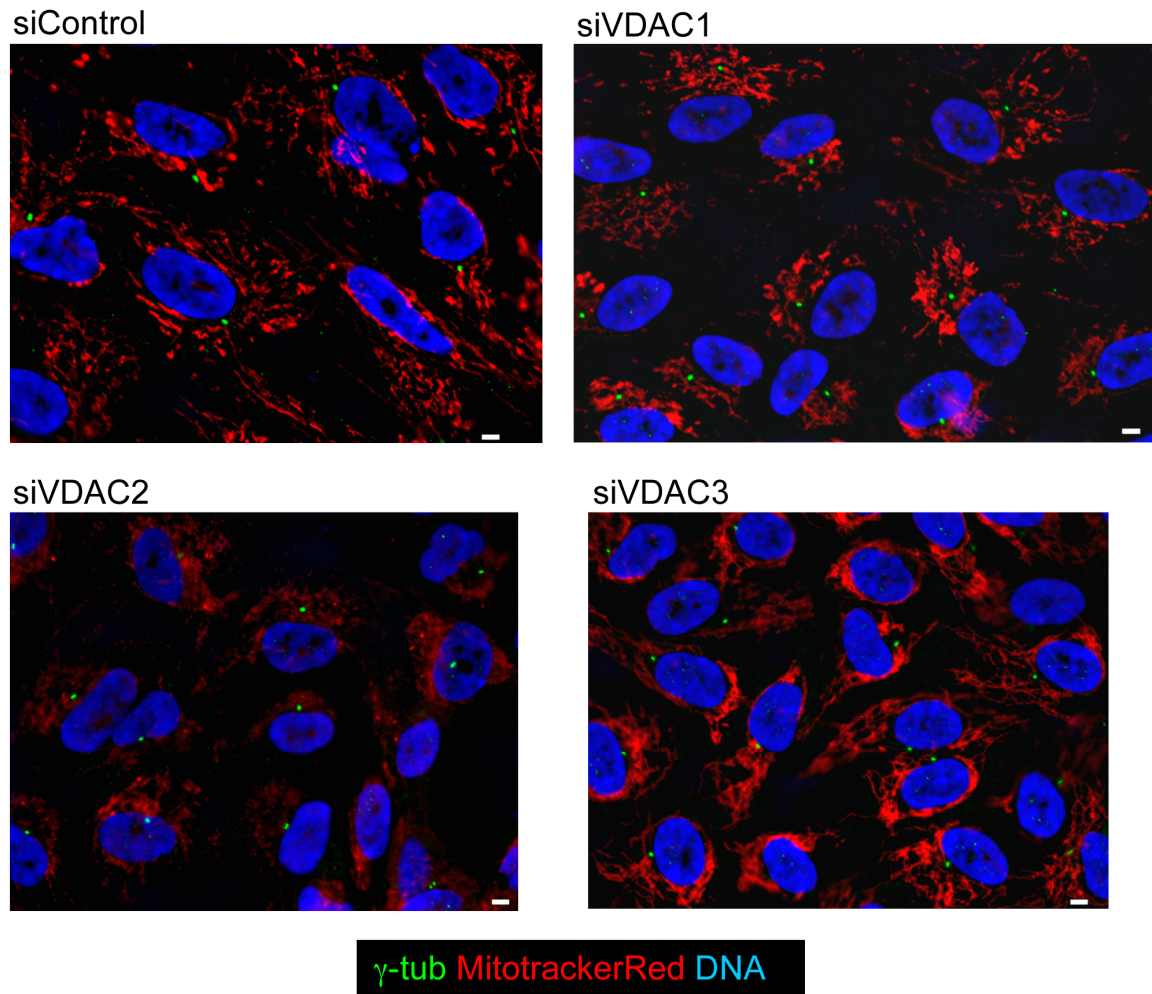

**Figure S4.** Depletion of VDAC2, but not VDAC1 or VDAC3 causes significant change in mitochondrial membrane potential in RPE1 cells. Asynchronously growing RPE1 cells treated with siRNAs against Lamin A/C (siControl), VDAC1 (siVDAC1), VDAC2 (siVDAC2) and VDAC3 (siVDAC3) were incubated with 100  $\mu$ M MitotrackerRed (red) for 1 h, washed and grown in cell culture medium for 30 min. Cells were then fixed, and stained for  $\gamma$ -tub (green) and DNA (blue). Bar = 5  $\mu$ m.

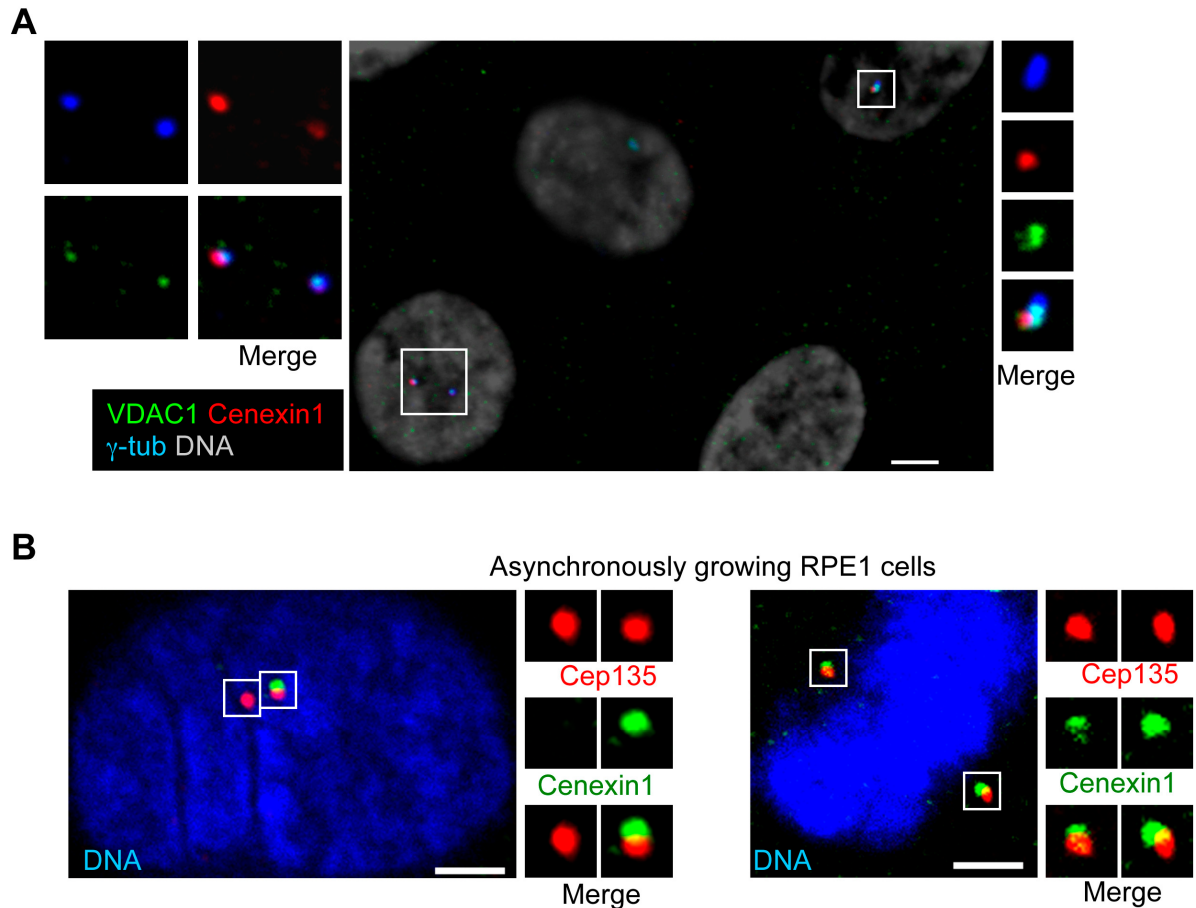

**Figure S5.** The centrosomal VDAC1 level varies in different cell cycle phases. (A–B) Representative images of asynchronously growing RPE1 cells stained for (A)  $\gamma$ -tub (blue), VDAC1 (green), and hCenexin1/Odf2 (red); and (B) hCenexin1/Odf2 (green) and Cep135 (red). In (A), the cell on the right is S-phase (as judged by one strong hCenexin1/Odf2 focus on one of the two  $\gamma$ -tub lobes) and the cell on the left is in late G2-phase (as judged by two separated centrosomes, with one having stronger and the other one having faint hCenexin1/Odf2 staining). DNA is grey in (A) and blue in (B), and bar = 5  $\mu$ m.

**Table S1.** List of primers used in this study.

| Primer Name            | Purpose                                                            | Sequence                                      |
|------------------------|--------------------------------------------------------------------|-----------------------------------------------|
| VDAC1 Fwd inf in GFP   | Infusion primer to clone VDAC1 ORF into pHF286 to construct pHF307 | 5'-ACGAGCTGTACAAGGGTACCATGGCTGTGCCACCCACG-3'  |
| VDAC1 Rev inf in pECE  | Infusion primer to clone VDAC1 ORF into pHF286 to construct pHF307 | 5'-TACTTATCTATCTAGACTATTATGCTTGAAATTCCAG-3'   |
| VDAC2 Fwd inf in GFP   | Infusion primer to clone VDAC2 ORF into pHF286 to construct pHF308 | 5'-ACGAGCTGTACAAGGGTACCATGGCGACCCACGGACAG-3'  |
| VDAC2 Rev inf in pECE  | Infusion primer to clone VDAC2 ORF into pHF286 to construct pHF308 | 5'-TACTTATCTATCTAGACTATTAAGCCTCCAACCTCCAG-3'  |
| VDAC1 siRes mut top    | Site directed mutagenesis of pHF307 to pHF309                      | 5'-GTTTAGGATACACACAAACCCTTAAGCCAGGTATTAAAC-3' |
| VDAC1 siRes mut bottom | Site directed mutagenesis of pHF307 to pHF309                      | 5'-GTTTAATACCTGGCTTAAGGGTTTGTGTGTATCCTAAAC-3' |
